# Supplementary material for: Design Mechanism and Property of the Novel Fluorescent Probes for the Identification of Microthrix parvicella In Situ
Source: MDPI journal article supplement (doi:10.3390/ma10070804), 2017-07-15
Supplement: s1 [file s1]

# Supplementary Materials: Design Mechanism and Property of the Novel Fluorescent Probes for the Identification of *Microthrix parvicella* in Situ

Xiumei Jiao <sup>1,2</sup>, Xuening Fei <sup>1,2,3,\*</sup>, Songya Li <sup>1</sup>, Dayong Lin <sup>1</sup>, Huaji Ma <sup>2</sup> and Baolian Zhang <sup>3</sup>

<sup>1</sup> School of Environmental Science and Engineering, Tianjin University, Tianjin 300072, China; jiaoxiumei@163.com (X.J.); lsongya90@163.com (S.L.); wjlinday@163.com (D.L.)

<sup>2</sup> Tianjin Key Laboratory of Aquatic Science and Technology, School of Environmental and Municipal Engineering, Tianjin Chengjian University, Tianjin 300384, China; mahjh510@163.com

<sup>3</sup> School of Science, Tianjin Chengjian University, Tianjin 300384, China; ybysw@126.com

\* Correspondence: [xueningfei@126.com](mailto:xueningfei@126.com); Tel.: +86-22-2377-3360; Fax: +86-22-2308-5032

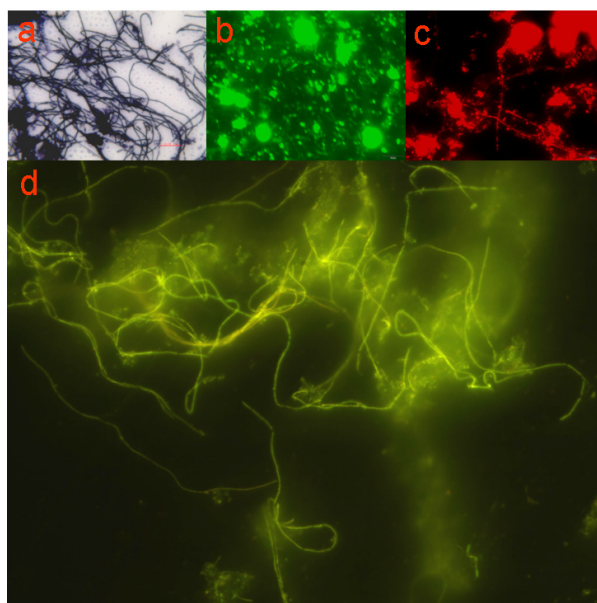

**Figure S1.** Images taken in Gram staining (a), FISH staining (b, c) and the novel probe identifying (d) of sludge samples. Green colour represents for the bacteria encountered in the sludge (EUB mix (EUB338, EUB338II, EUB338III) (b); Red color marks the targeted filamentous organism of *M. parvicella* (MPA60, MPA223, MPA645) (c); the identification image of novel probe A in our article for *M. parvicella* in situ (d). To get the fluorescent images, a 40× objective was used.

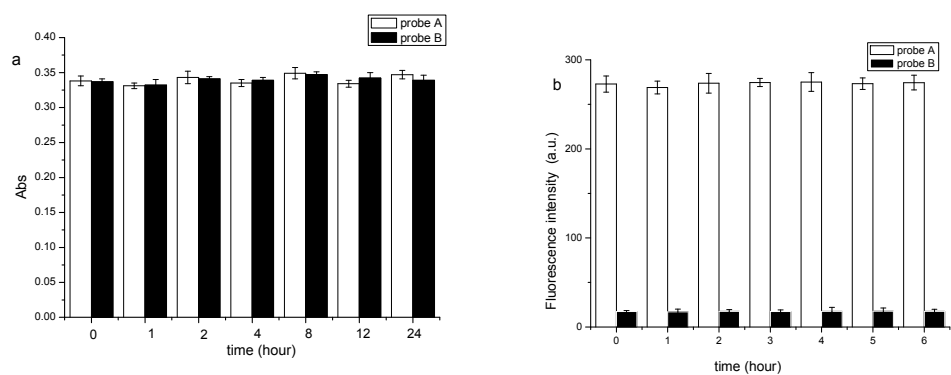

Figure S2 Photostability of probe A and probe B, S2a is the absorption of probe A and probe B, S2b is the fluorescence intensity of probe A and probe B

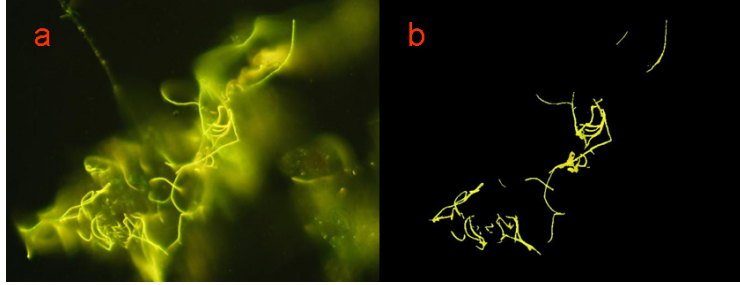

**Figure S3.** Example images analysis for quantification of the mean fluorescence intensity of *M. parvicella*. (a) The fluorescent inverted microscope (OLYMPUS-IX71) images of labeling *M. parvicella* in situ by the novel probe A; (b) The same visualization of *M. parvicella* as in a, in addition to the filamentous, other part is invisible, used to calculate the mean fluorescence intensity of *M. parvicella* (IOD/Area) inside the floc are clearly quantified.
